# Supplementary material for: Preparation of Ru(ii)@oligonucleotide nanosized polymers as potential tumor-imaging luminescent probes
Source: Royal Society of Chemistry journal article supplement (doi:10.1039/c8ra05454a), 2018-01-01
Supplement: c8ra05454a1.pdf [file c8ra05454a1.pdf]

# Preparation of Ru(II)@Oligonucleotides Nanosized Polymers as Potential Tumor-Imaging Luminescence Probes

Geng-Nan Yu,<sup>‡a</sup> Jun-Chao Huang,<sup>‡b</sup> Li Li,<sup>a</sup> Ruo-Tong Liu,<sup>a</sup> Jie-Qiong Cao,<sup>c</sup> Qiong Wu,<sup>\*ac</sup> Shuang-Yan Zhang,<sup>a</sup> Cheng-Xi Wang,<sup>\*a</sup> Wen-Jie Mei,<sup>\*ad</sup> and Wen-Jie Zheng,<sup>c</sup>

<sup>‡</sup> *These authors contributed equally to the work*

<sup>a</sup> *School of Pharmacy, Guangdong Pharmaceutical University, Guangzhou, 510006, China. E-mail: wenjiemei@126.com; wuqiongnu.1113@163.com; hiwcx@hotmail.com*

<sup>b</sup> *Traditional Chinese Medicine College, Guangdong Pharmaceutical University, Guangzhou, 510006, China*

<sup>c</sup> *School of Chemistry, Jinan University, Guangzhou, 510430, China*

<sup>d</sup> *Guangdong Province Engineering Technology Centre for Molecular Probe and Biomedicine Imaging, Guangzhou, 510006, China*

## CONTENTS

|                                                                                 |     |
|---------------------------------------------------------------------------------|-----|
| 1. ESI-MS spectra of <b>1</b> and <b>2</b> .....                                | S1  |
| 2. <sup>1</sup> H NMR of <b>1</b> and <b>2</b> .....                            | S2  |
| 3. <sup>13</sup> C NMR of <b>1</b> and <b>2</b> .....                           | S3  |
| 4. The average sizes of oligonucleotides induced by <b>1</b> and <b>2</b> ..... | S4  |
| 5. The average sizes of CT-DNA induced by <b>1</b> and <b>2</b> .....           | S5  |
| 6. The AFM image of oligonucleotides and CT-DNA .....                           | S6  |
| 7. TEM observation .....                                                        | S7  |
| 8. Particle size .....                                                          | S8  |
| 9. Viscosity Measurements .....                                                 | S9  |
| 10. Zebrafish imaging .....                                                     | S10 |

1. The ESI-MS spectra of 1 and 2

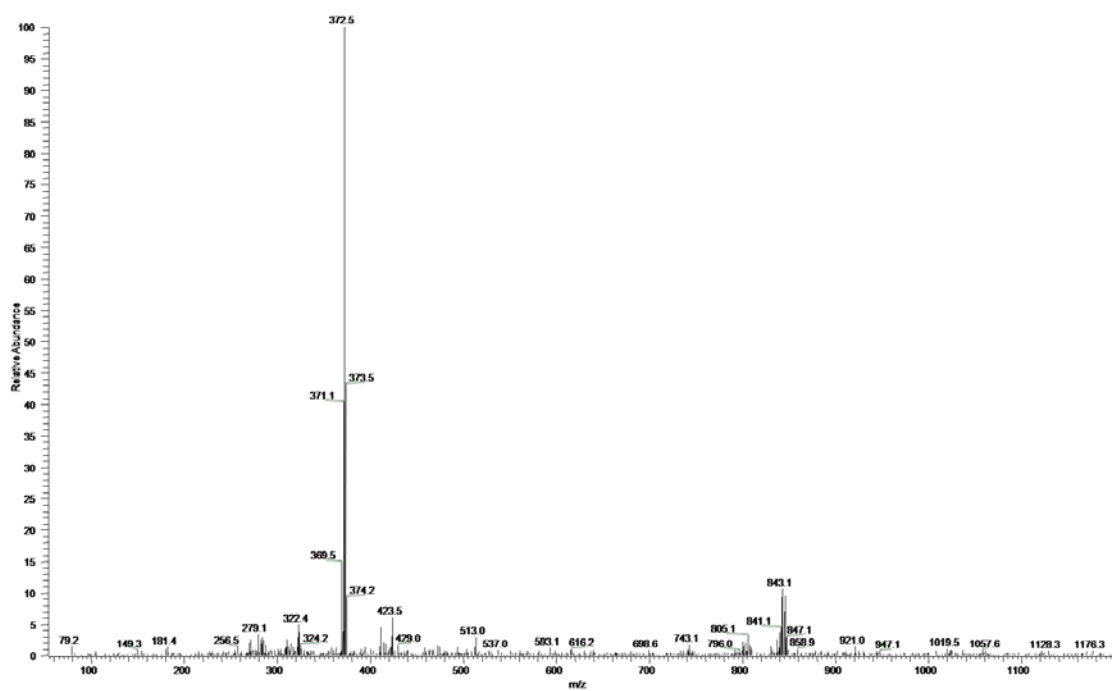

A

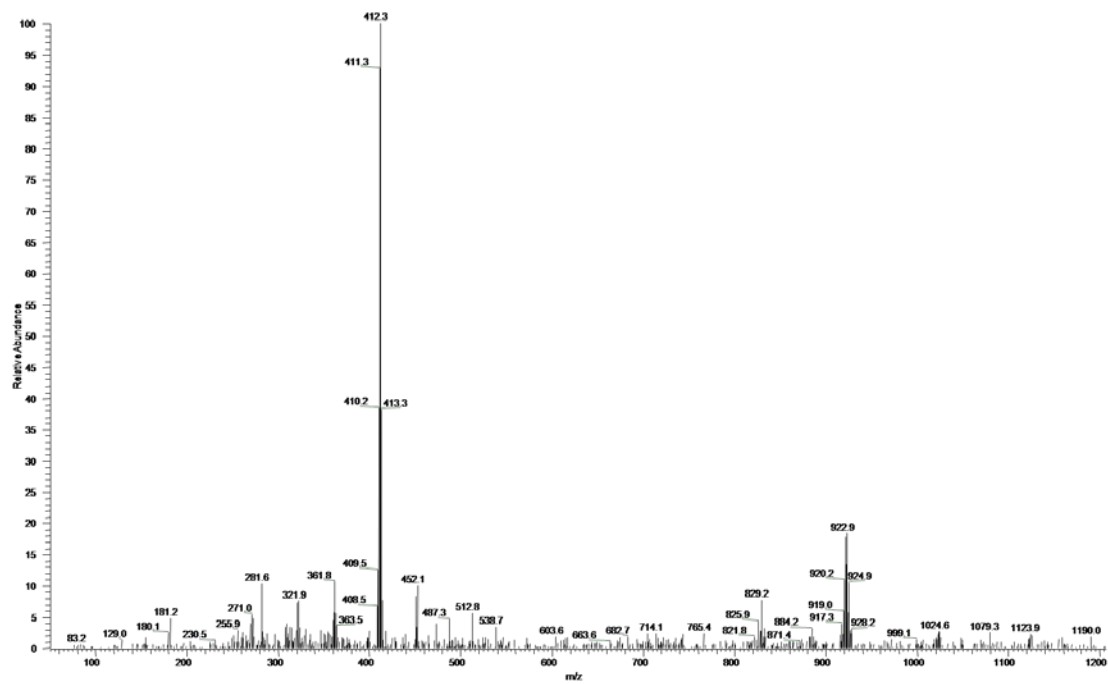

B

Figure S1. The ESI-MS spectra of 1 (A) and 2 (B)

2. The  $^1\text{H}$  NMR spectra of **1** and **2**

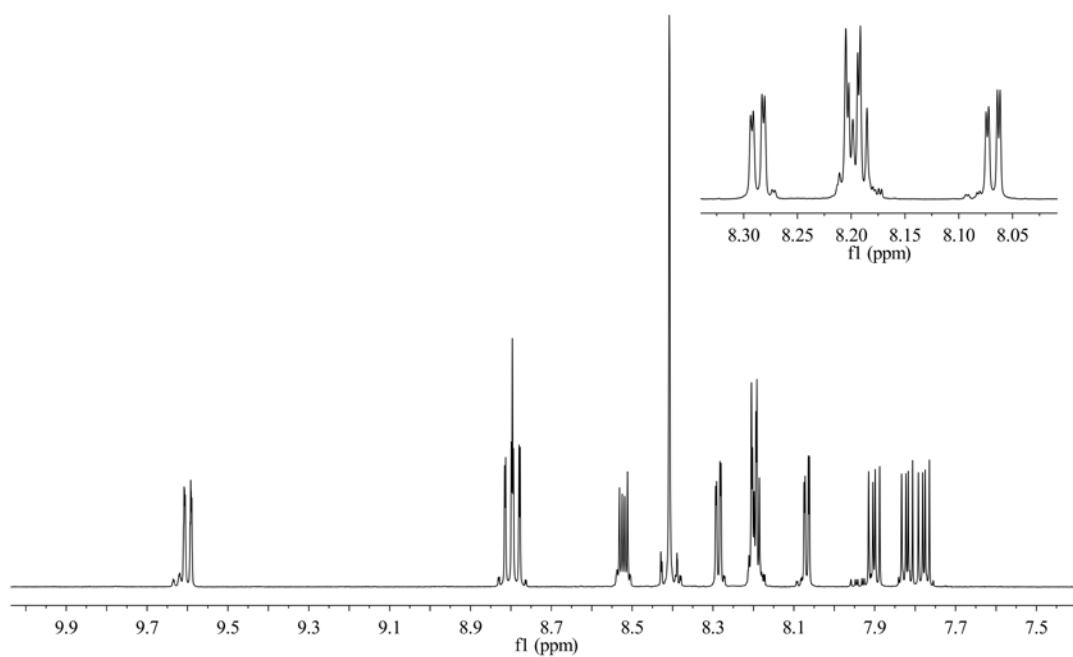

A

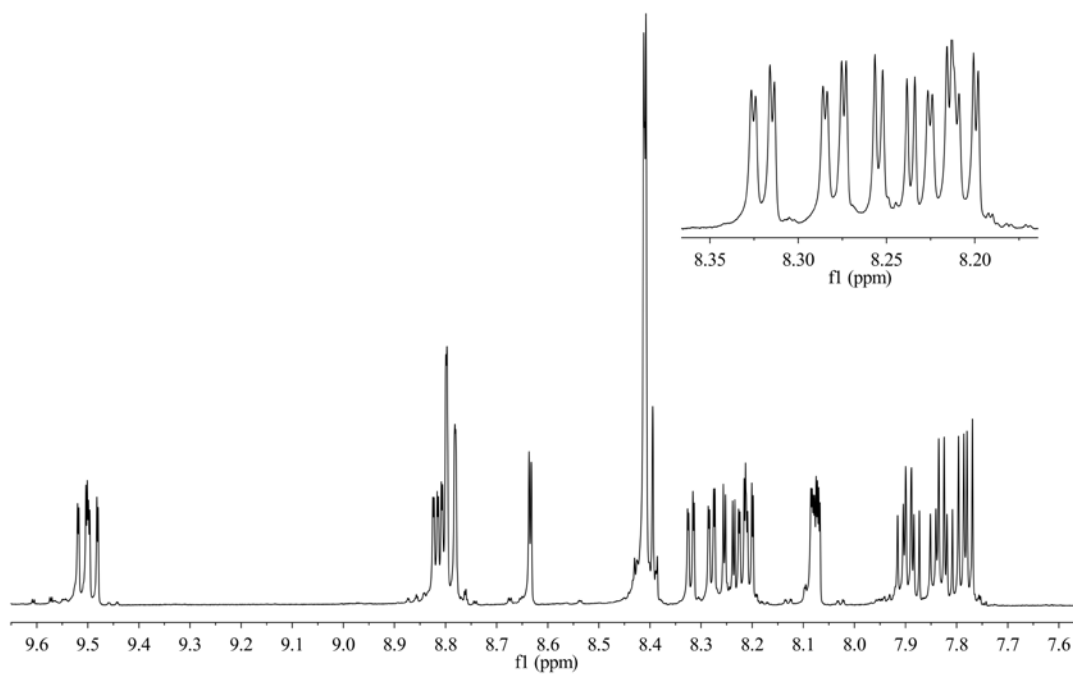

B

**Figure S2.** The  $^1\text{H}$  NMR spectra of **1** (A) and **2** (B)

3. The  $^{13}\text{C}$  NMR spectra of **1** and **2**

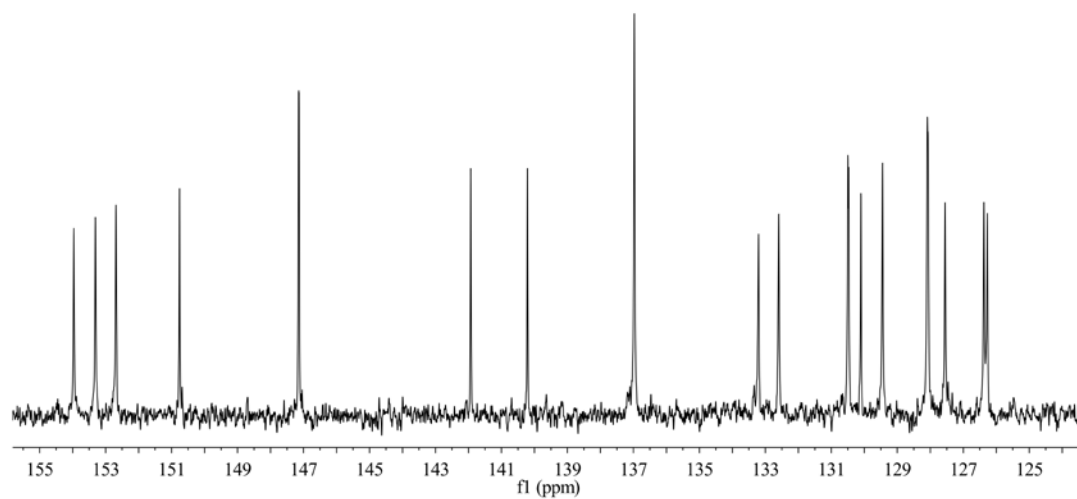

A

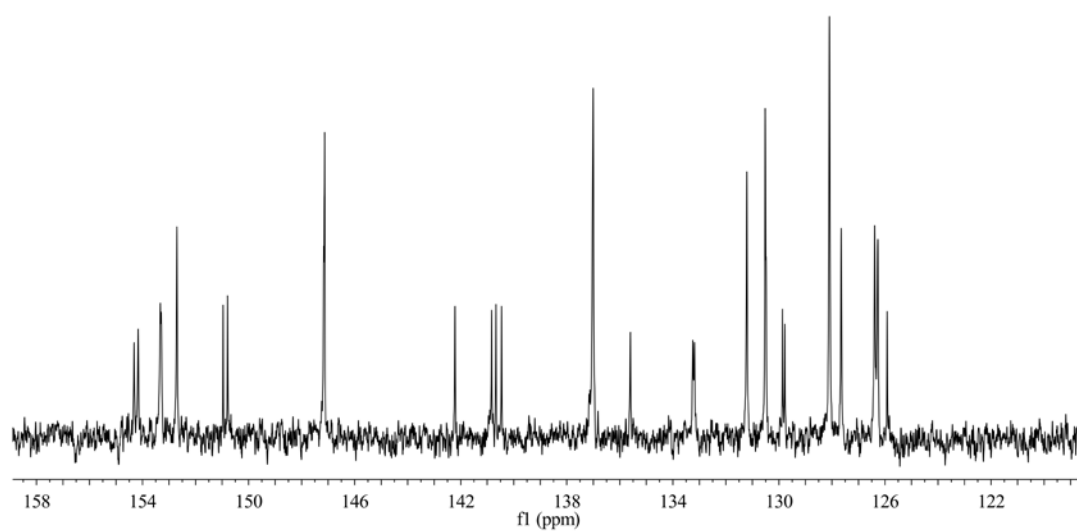

B

**Figure S3.** The  $^{13}\text{C}$  NMR spectra of **1** (A) and **2** (B)

4. The average sizes of oligonucleotides induced by **1** and **2**

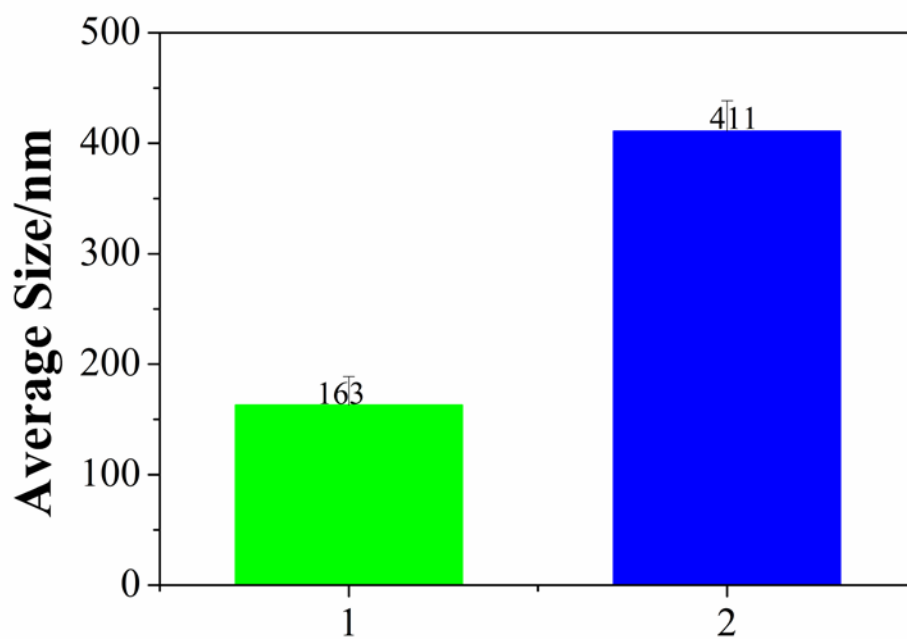

**Figure S4.** The average sizes of nanosized polymers of oligonucleotides induced by **1** and **2**. Error bars represent the mean standard deviation.

5. The average sizes of CT-DNA induced by **1** and **2**

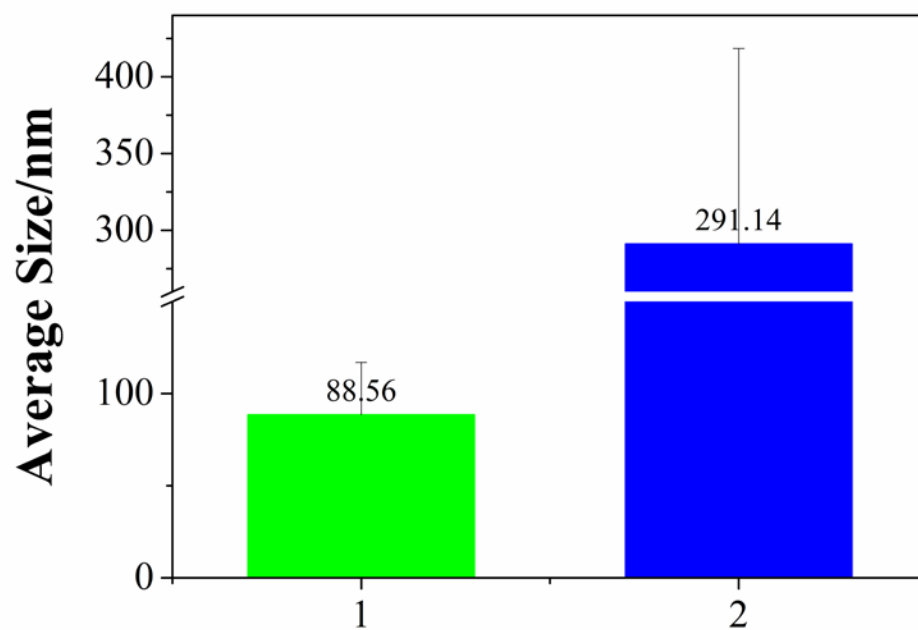

**Figure S5.** The average sizes of nanosized polymers of CT-DNA induced by **1** and **2**. Error bars represent the mean standard deviation.

6. The AFM images of oligonucleotides and CT-DNA

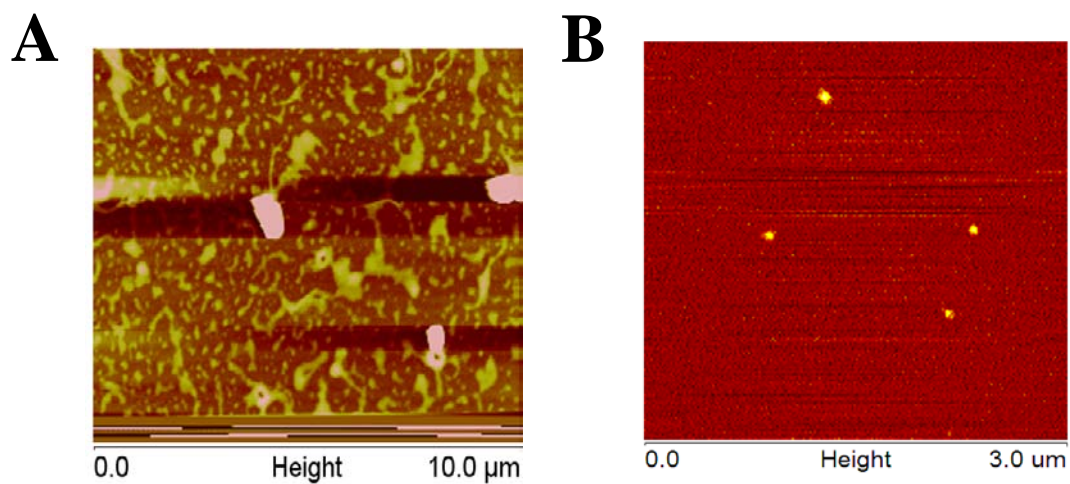

**Figure S6.** (A) The AFM image of free oligonucleotides (100 μM) in pH = 7.2 Tris-HCl KCl buffers. (B) The AFM image of free CT-DNA (100 μM) in pH = 7.2 Tris-HCl NaCl buffers .



7. TEM observation

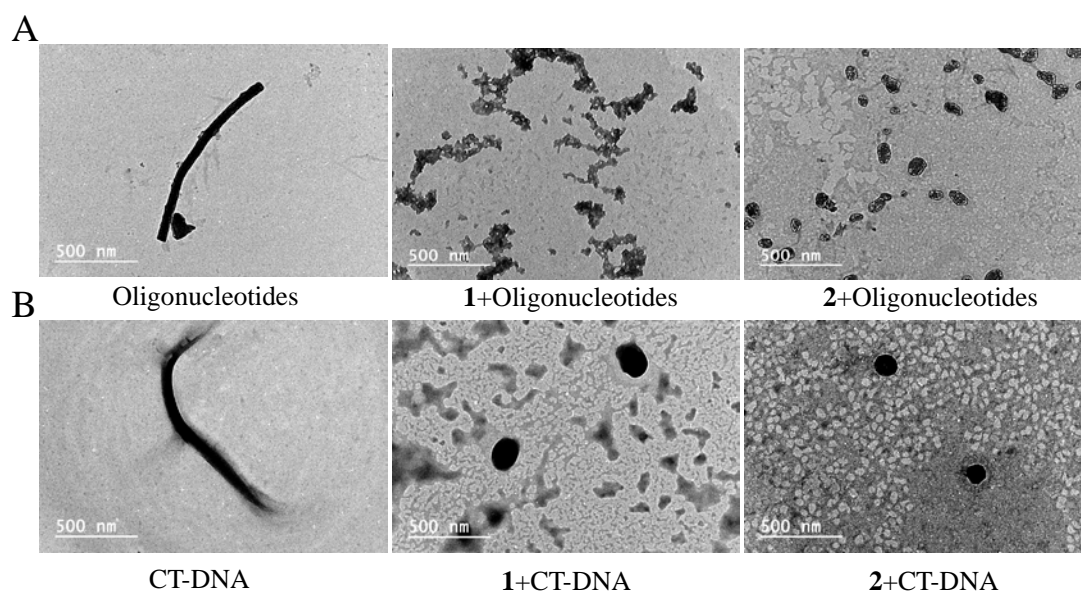

**Figure S7.** (A) TEM image of free oligonucleotides, **1@oligonucleotides** and **2@oligonucleotides** (in Tris-HCl KCl buffer, pH 7.2). ( $[Ru] = 100 \mu\text{M}$ ,  $[\text{oligonucleotides}] = 100 \mu\text{M}$ ); (B) TEM image of free CT-DNA, **1@CT-DNA** and **2@CT-DNA** (in Tris-HCl NaCl buffer, pH 7.2). ( $[Ru] = 100 \mu\text{M}$ ,  $[\text{CT-DNA}] = 100 \mu\text{M}$ )

8. Particle size

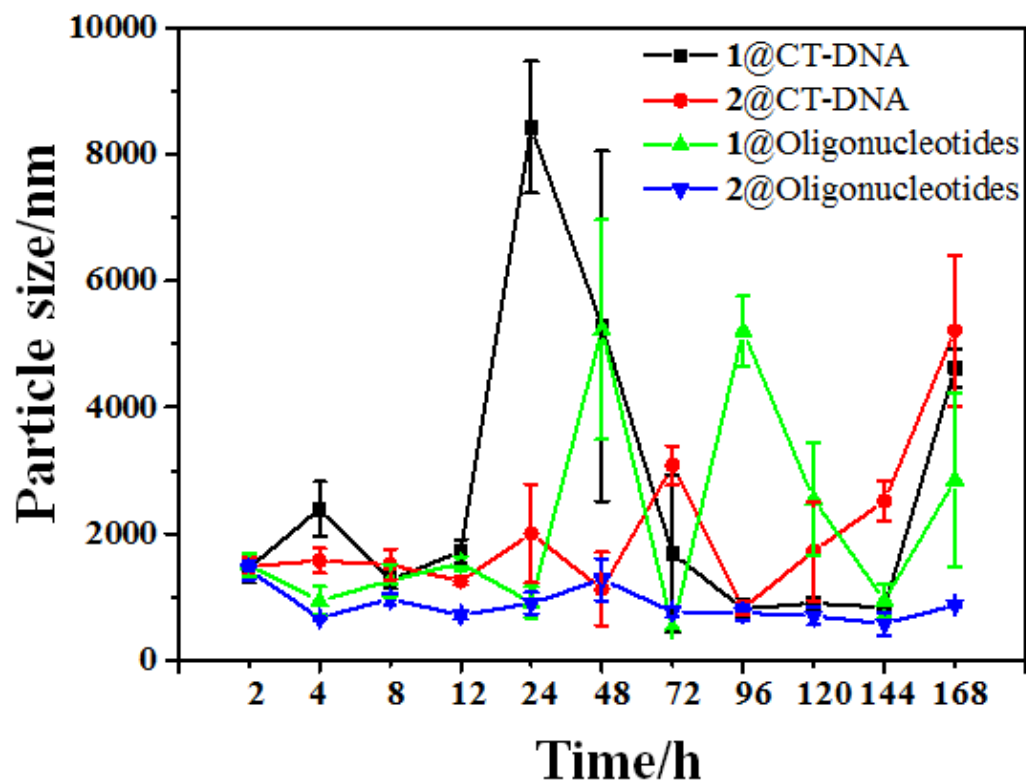

**Figure S8.** The particle size change of oligonucleotides and CT-DNA after being treating by **1** and **2** varied with time. ( $[\text{Ru}] = 10 \mu\text{M}$ ,  $[\text{CT-DNA}] = 10 \mu\text{M}$ ,  $[\text{oligonucleotides}] = 10 \mu\text{M}$ )

9. Viscosity Measurements

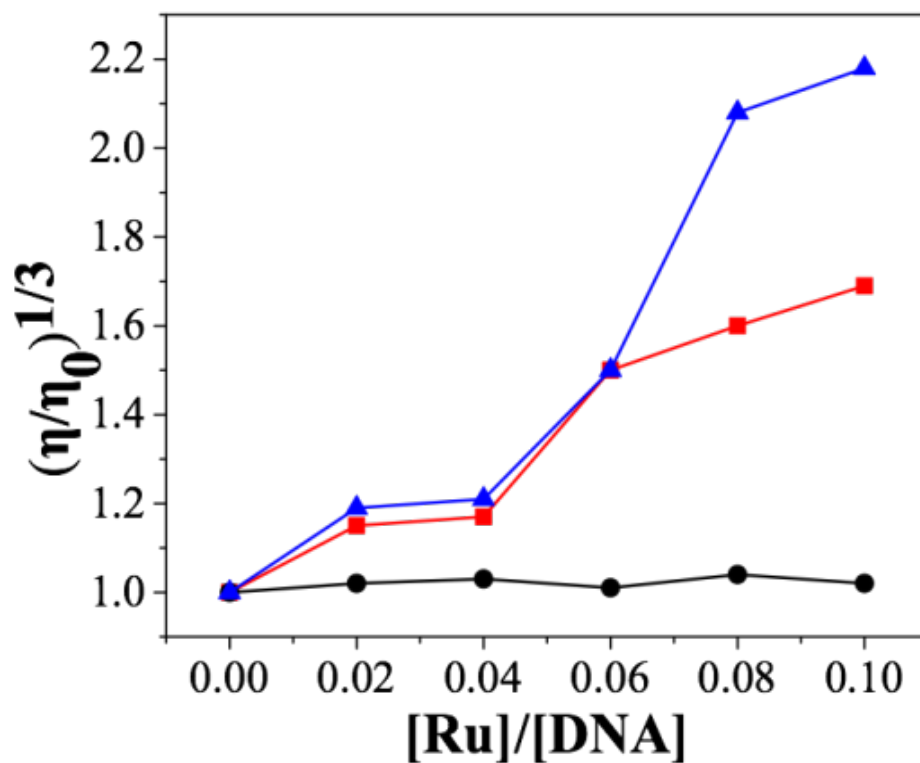

**Figure S9.** Effect of increasing amounts of 1 ( $\blacksquare$ ), 2 ( $\blacktriangle$ ),  $Ru(bpy)_3Cl_2$  ( $\bullet$ ) on the relative viscosity of CT-DNA at  $30.0 (\pm 0.1)^\circ C$ , the total concentration of DNA is 0.5 mM.

10. Zebrafish imaging

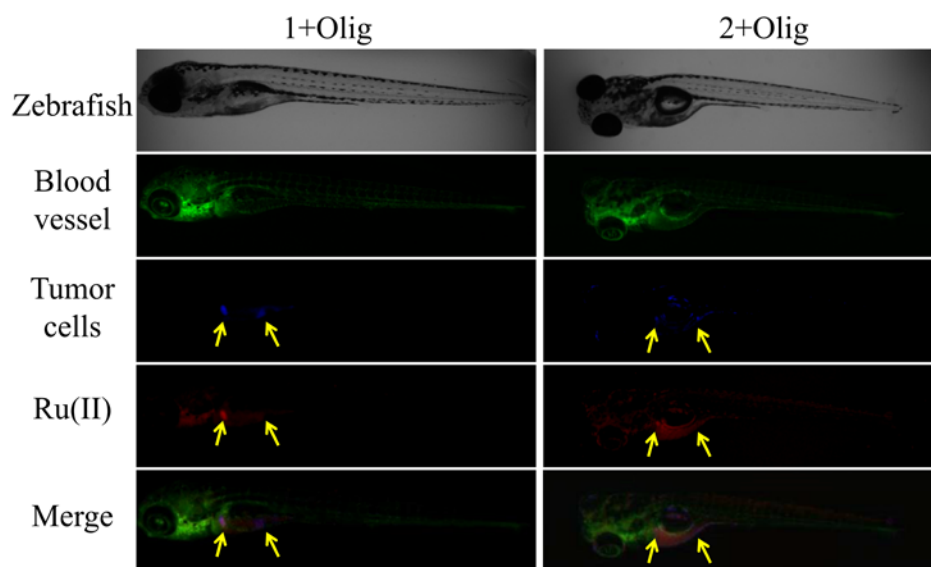

**Figure S10.** Tumor area highlighted by **1**@oligonucleotides and **2**@oligonucleotides in zebrafish xenografts model. ( $[\text{Ru}] = 2.5 \mu\text{M}$ ,  $[\text{oligonucleotides}] = 2.5 \mu\text{M}$ )
